# Supplementary material for: SUR1 Receptor Interaction with Hesperidin and Linarin Predicts Possible Mechanisms of Action of Valeriana officinalis in Parkinson
Source: PubMed Central journal article supplement (PMC4852538; doi:10.3389/fnagi.2016.00097), 2016-05-02
Supplement: Table_1.pdf [file Table_1.pdf]

**Table 1****Molecular docking studies for Complex I**

| <b>Rotenone</b> |                            |                        |                       | <b>NADH+H</b> |                            |                        |                       |
|-----------------|----------------------------|------------------------|-----------------------|---------------|----------------------------|------------------------|-----------------------|
| <b>mode</b>     | <b>Affinity (Kcal/Mol)</b> | <b>Dist. from rmsd</b> | <b>Best mode rmsd</b> | <b>mode</b>   | <b>Affinity (Kcal/Mol)</b> | <b>Dist. from rmsd</b> | <b>Best mode rmsd</b> |
| 1               | -7.3                       | 0.000                  | 0.000                 | 1             | -10.1                      | 0.000                  | 0.000                 |
| 2               | -7.1                       | 30.779                 | 33.815                | 2             | -9.6                       | 1.500                  | 2.582                 |
| 3               | -6.8                       | 2.137                  | 4.055                 | 3             | -7.6                       | 7.627                  | 11.490                |
| 4               | -6.7                       | 2.707                  | 10.625                | 4             | -7.5                       | 31.685                 | 36.289                |
| 5               | -6.7                       | 1.861                  | 2.452                 | 5             | -7.4                       | 31.721                 | 36.214                |
| 6               | -6.6                       | 1.880                  | 9.458                 | 6             | -7.4                       | 27.032                 | 32.157                |
| 7               | -6.6                       | 2.744                  | 10.189                | 7             | -7.3                       | 27.076                 | 31.999                |
| 8               | -6.5                       | 2.421                  | 9.875                 | 8             | -7.2                       | 33.154                 | 36.793                |
| 9               | -6.4                       | 3.991                  | 9.532                 | 9             | -7.2                       | 27.659                 | 33.147                |

Molecular docking calculations for the interaction between Mitochondrial Complex I with Rotenone and NADH+H. Table shows different docking poses and affinities for each molecular ligand's conformations.
